# Supplementary figures and images for: Analyzing angiogenesis on a chip using deep learning-based image processing
Source: Royal Society of Chemistry journal article supplement (doi:10.1039/d2lc00983h), 2023-01-01

**a) Daily progression**

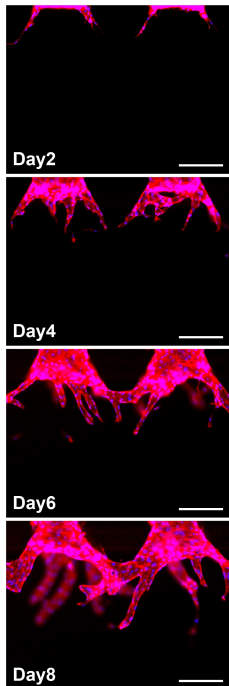

**b) VEGF Conc.**

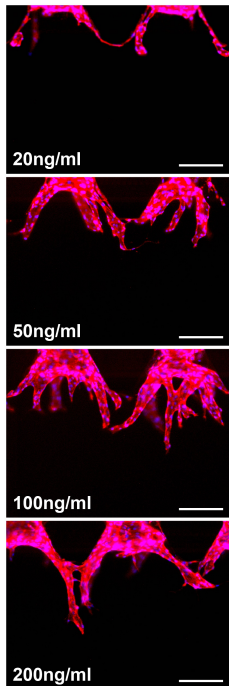

Supplement: d2lc00983h8.pdf [file d2lc00983h8.pdf]

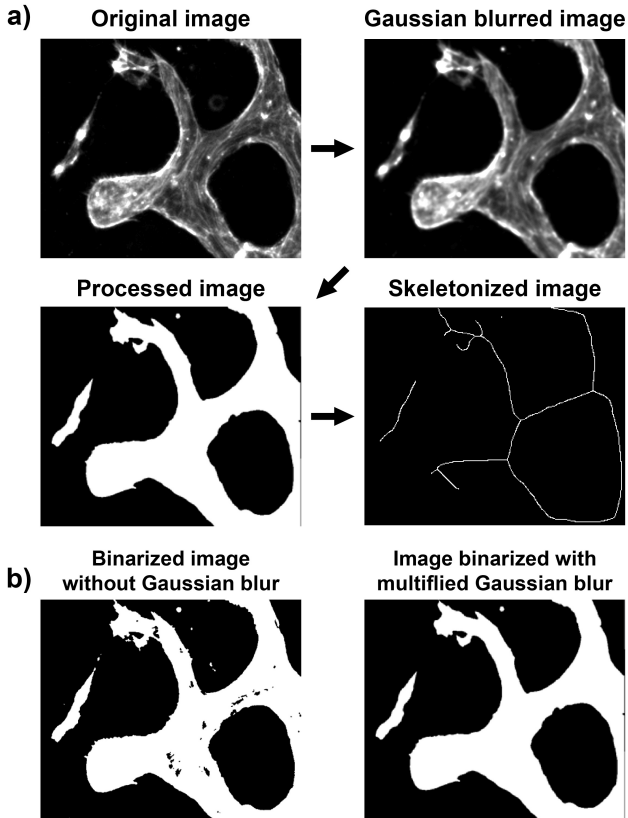

Supplement: d2lc00983h9.pdf [file d2lc00983h9.pdf]
